# Supplementary material
Source: Springer Nature journal article supplement (https://cris.unibo.it/retrieve/handle/11585/1069231/c9be051c-b181-4209-9ecc-5ada77a64606/41598_2026_39357_MOESM2_ESM.docx)
Supplement: MOESM2 [file 41598_2026_39357_MOESM2_ESM.docx]

**Supplemental Figure Legend**

**Suppl. Figure 1.** Kaplan-Meier survival curves concerning the other immunohistochemical markers. When possible and feasible, results were dichotomized in low- and high-expression. Note the significant survival curve of the CD68-positive intratumoral macrophages, but with a too different distribution among the groups to be considered.
